# Supplementary material for: Site-specific seismic hazard and risk potential of Bengal Basin with emphasis on holistic seismic hazard microzonation and its structural impact assessment in the cities of Dhanbad and Mymensingh
Source: Frontiers journal article supplement (doi:10.3389/feart.2022.959108), 2022-08-30
Supplement: Data_Sheet_3.DOCX [file Data_Sheet_3.DOCX]

Supplementary Material

**Site Specific Seismic Hazard and Risk Potential of Bengal Basin with emphasis on Holistic Seismic Hazard Microzonation and its Structural Impact Assessment in the cities of Dhanbad and Mymensingh**

Sankar Kumar Nath*, Arpita Biswas, Anand Srivastava, Arnab Sengupta, Chitralekha Ghatak, Jyothula Madan

1. Department of Geology and Geophysics, Indian Institute of Technology Kharagpur, Kharagpur, West Bengal, India

*Correspondence: Sankar Kumar Nath [nath@gg.iitkgp.ac.in](mailto:nath@gg.iitkgp.ac.in)

**1 Supplementary Text, Tables and Figures**

**
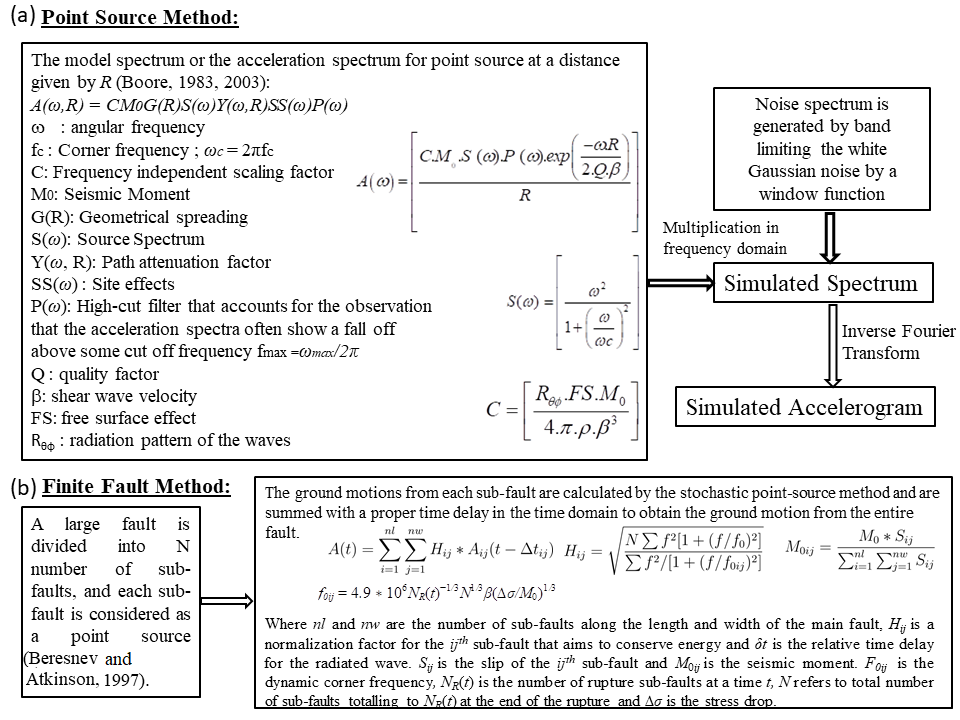
**

**Supplementary Figure S1.** Computational Protocol used in EXSIM finite fault stochastic method of strong ground motion simulation following Atkinson and Assatourians (2015).

**Supplementary Table S1.** 14 local-specific, regional and global prediction equations have been used that includes 6 Next Generation Attenuation (NGA) models developed in the course of this study (Nath, 2017) to account for the seismic influence of the tectonic provinces of Northeast India, East Central Himalaya, and Bengal Basin itself through nonlinear regression analysis.

| **Seismogenic Sources** | **Global/Regional Ground Motion Prediction Equations (GMPEs)** | **Next Generation Attenuation (NGA) Models** |
| --- | --- | --- |
| East-Central Himalaya | Sharma et al. (2009); Toro (2002); Campbell and Bozorgnia (2008) | Nath (2017); Campbell and Bozorgnia (2003); Atkinson and Boore (2006) |
| Bengal Basin | Raghukanth and Iyengar (2007); Toro (2002) | Nath *et al.* (2014); Maiti *et al.* (2017); Nath (2017); Campbell and Bozorgnia (2003); Atkinson and Boore (2006) |
| Northeast India | Youngs *et al.* (1997); Campbell and Bozorgnia (2008); Nath *et al.* (2012) (Shallow and Deep crust) | Nath *et al.* (2009); Nath *et al.* (2012); Nath (2017); Campbell and Bozorgnia (2003); Atkinson and Boore (2006) |


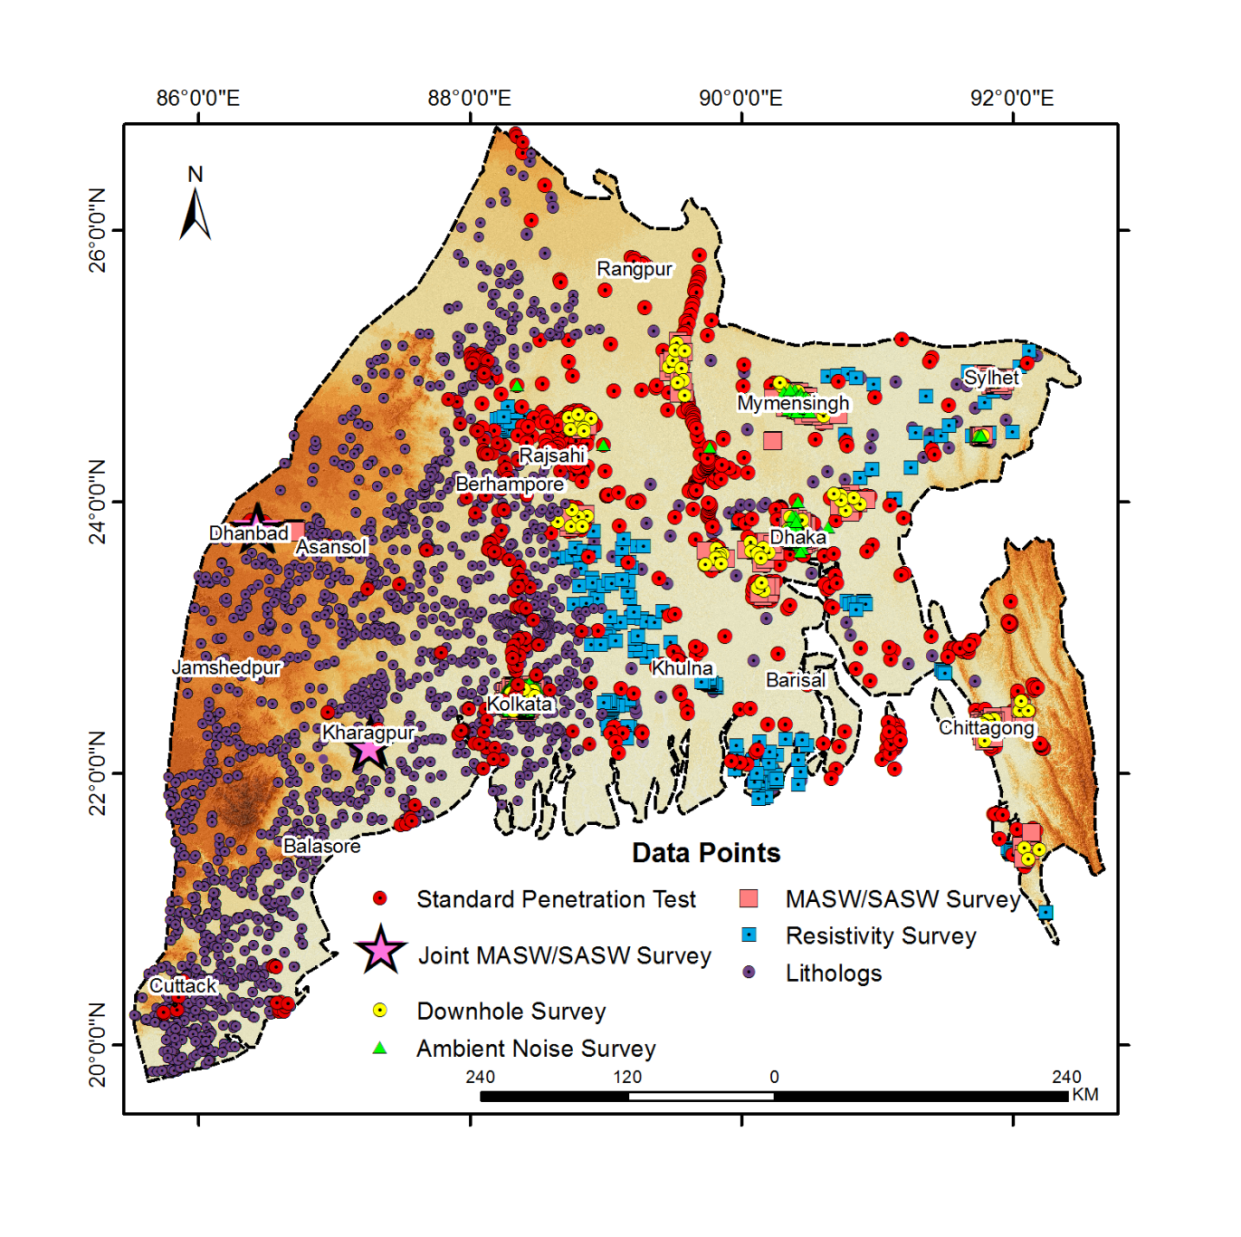


**Supplementary Figure S2.** Invasive and non-invasive investigation sites inBengal Basin.

**
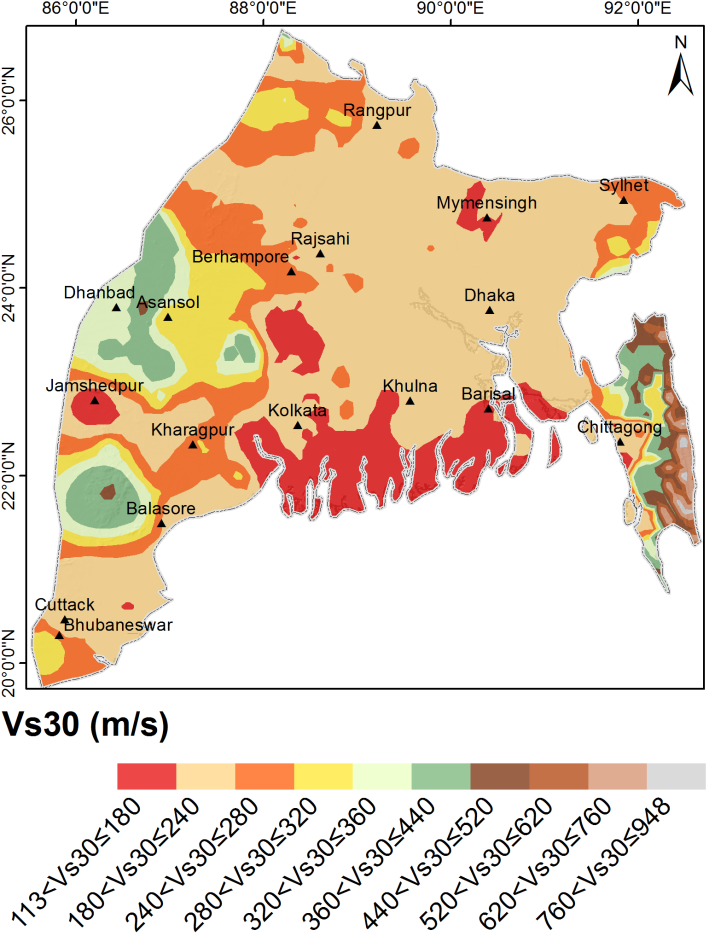
**

**Supplementary Figure S3.** Spatial distribution of effective shear wave velocity (VS30) depicting a variation of 113m/s to 948m/s in Bengal Basin.


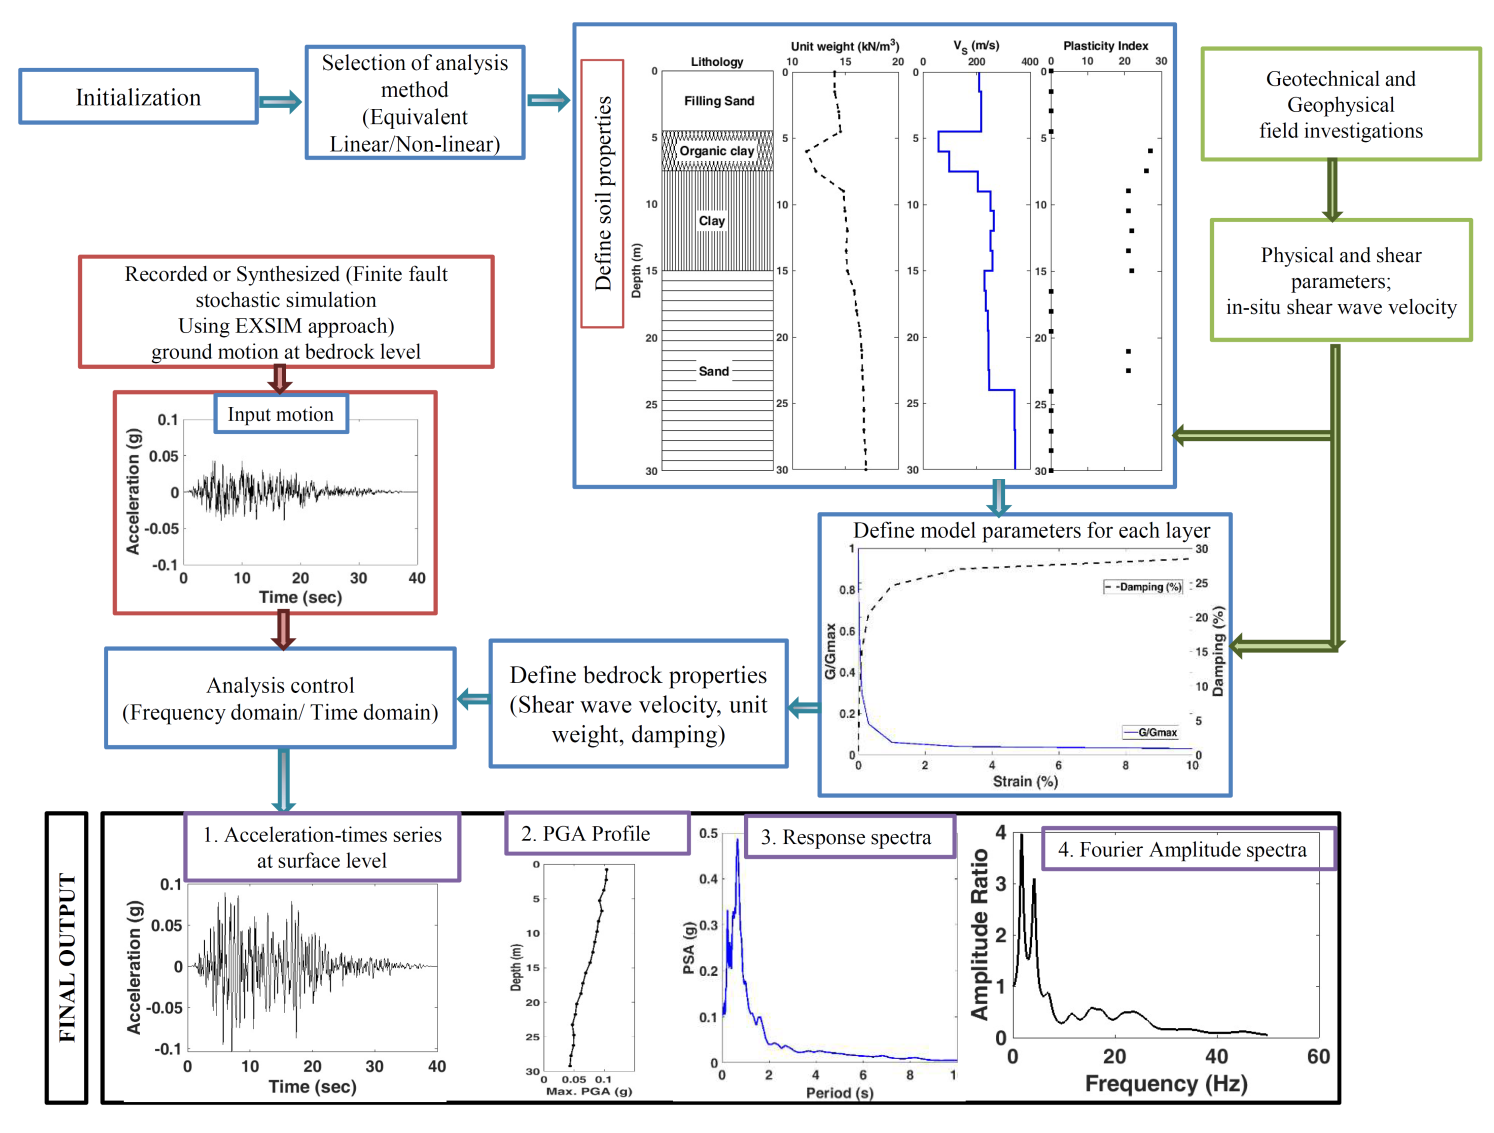


**Supplementary Figure S4.** Workflow in 1-D nonlinear/ equivalent linear site response analysis using DEEPSOIL following Hashash *et al.* (2020) with a representative dataset taken from Kotowali area in Dhaka.


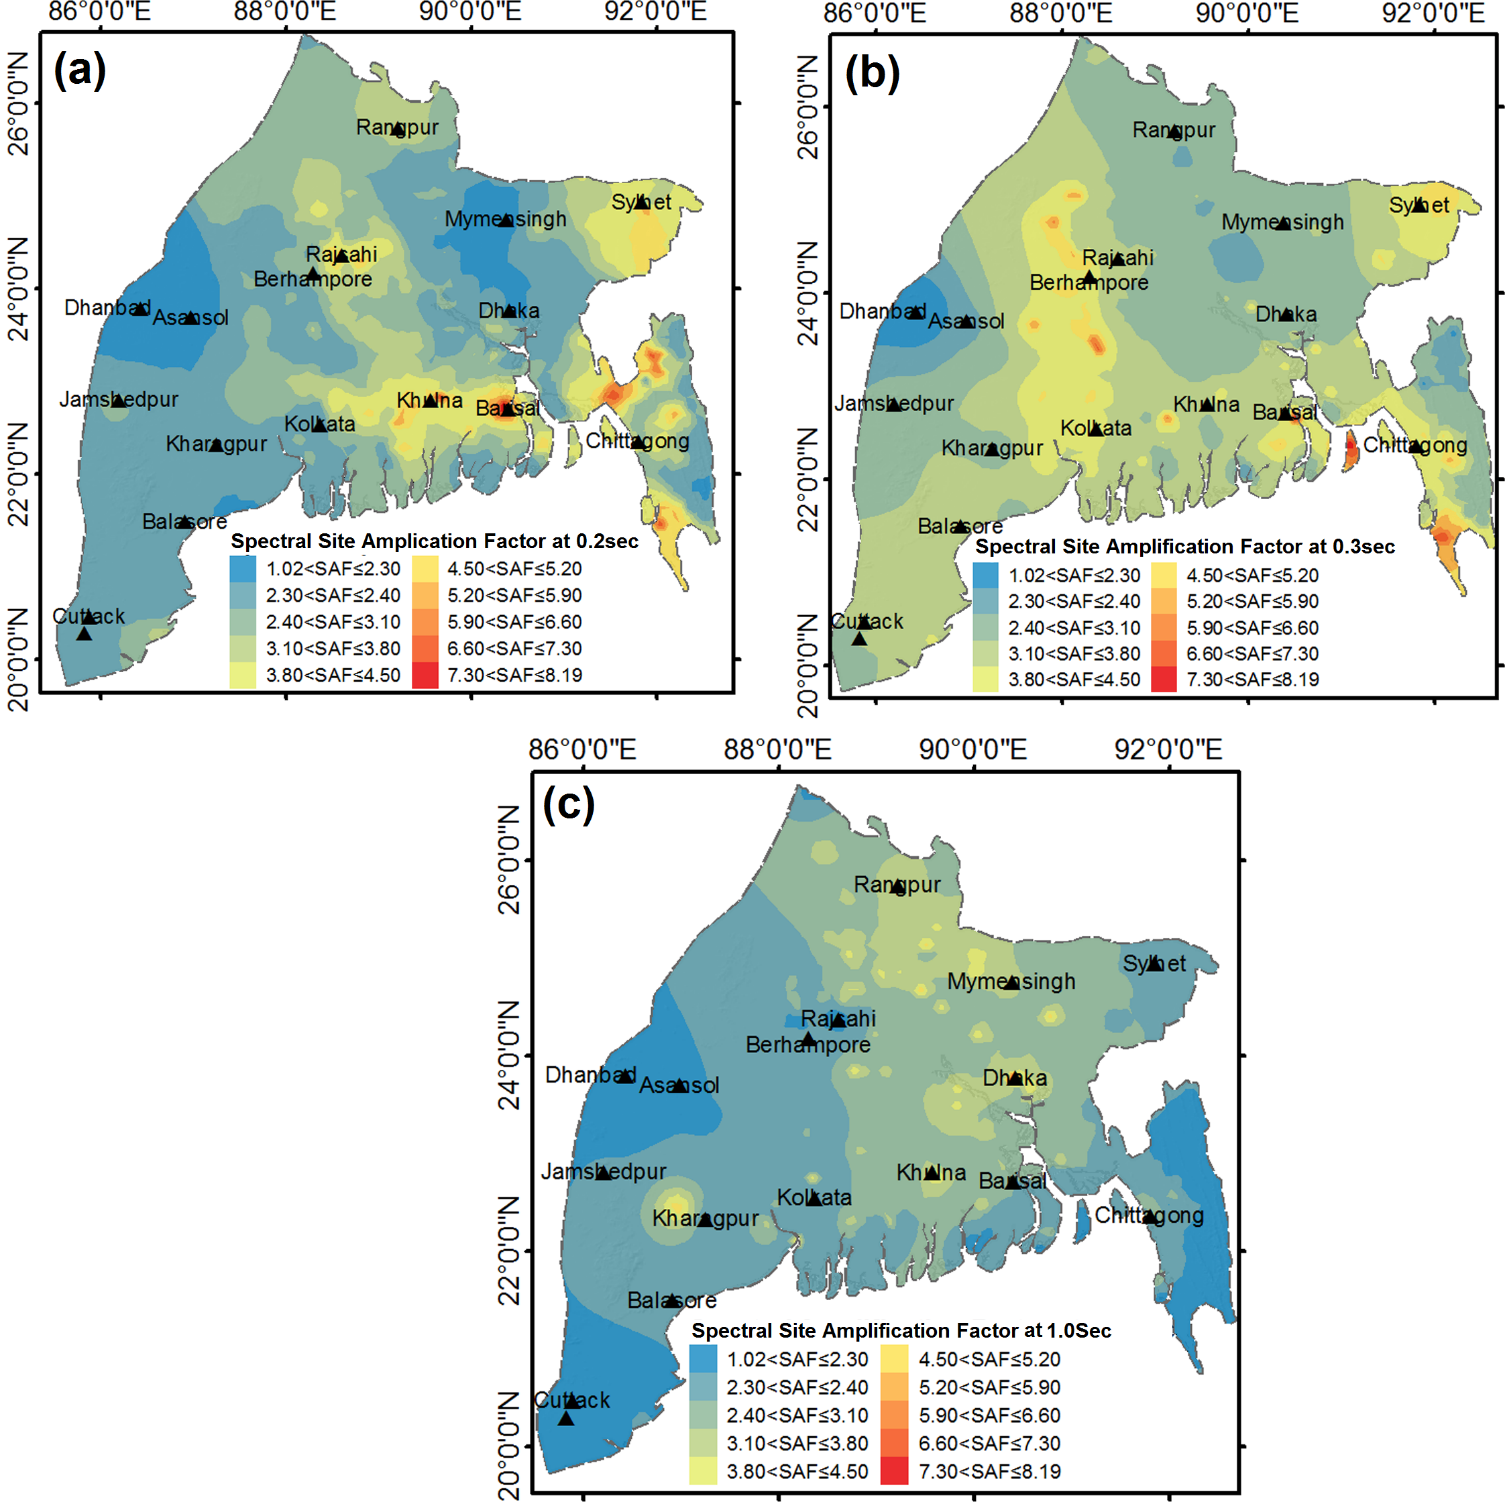


**Supplementary Figure S5.** Spatial distribution of Spectral Site Amplification Factor in Bengal Basin at predominant periods of (a) 0.2sec, (b) 0.3sec and (c) 1.0sec.


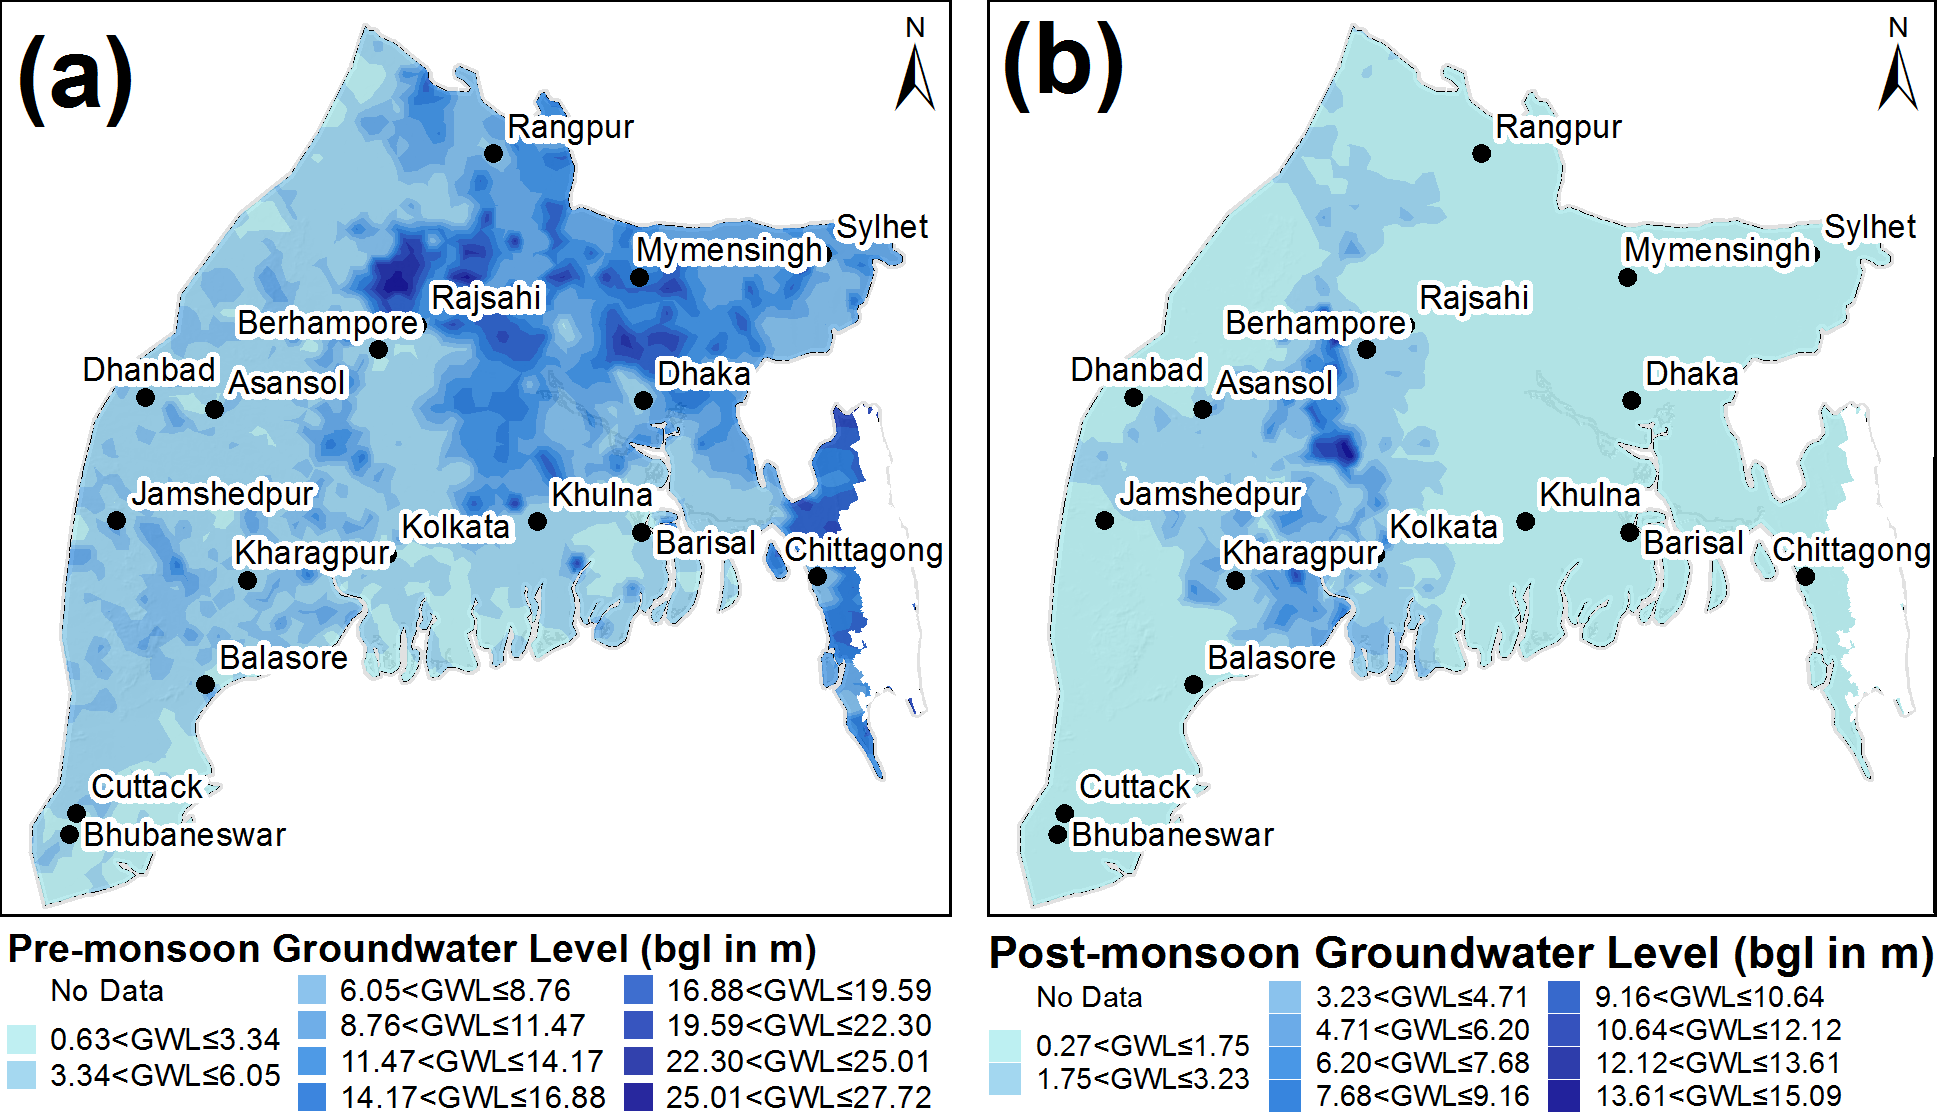


**Supplementary Figure S6.** Spatial distribution of groundwater level variation in Bengal Basin in (a) pre-monsoon and (b) post-monsoon seasons (adopted from CGWB, 2018; BWDB, 2020).


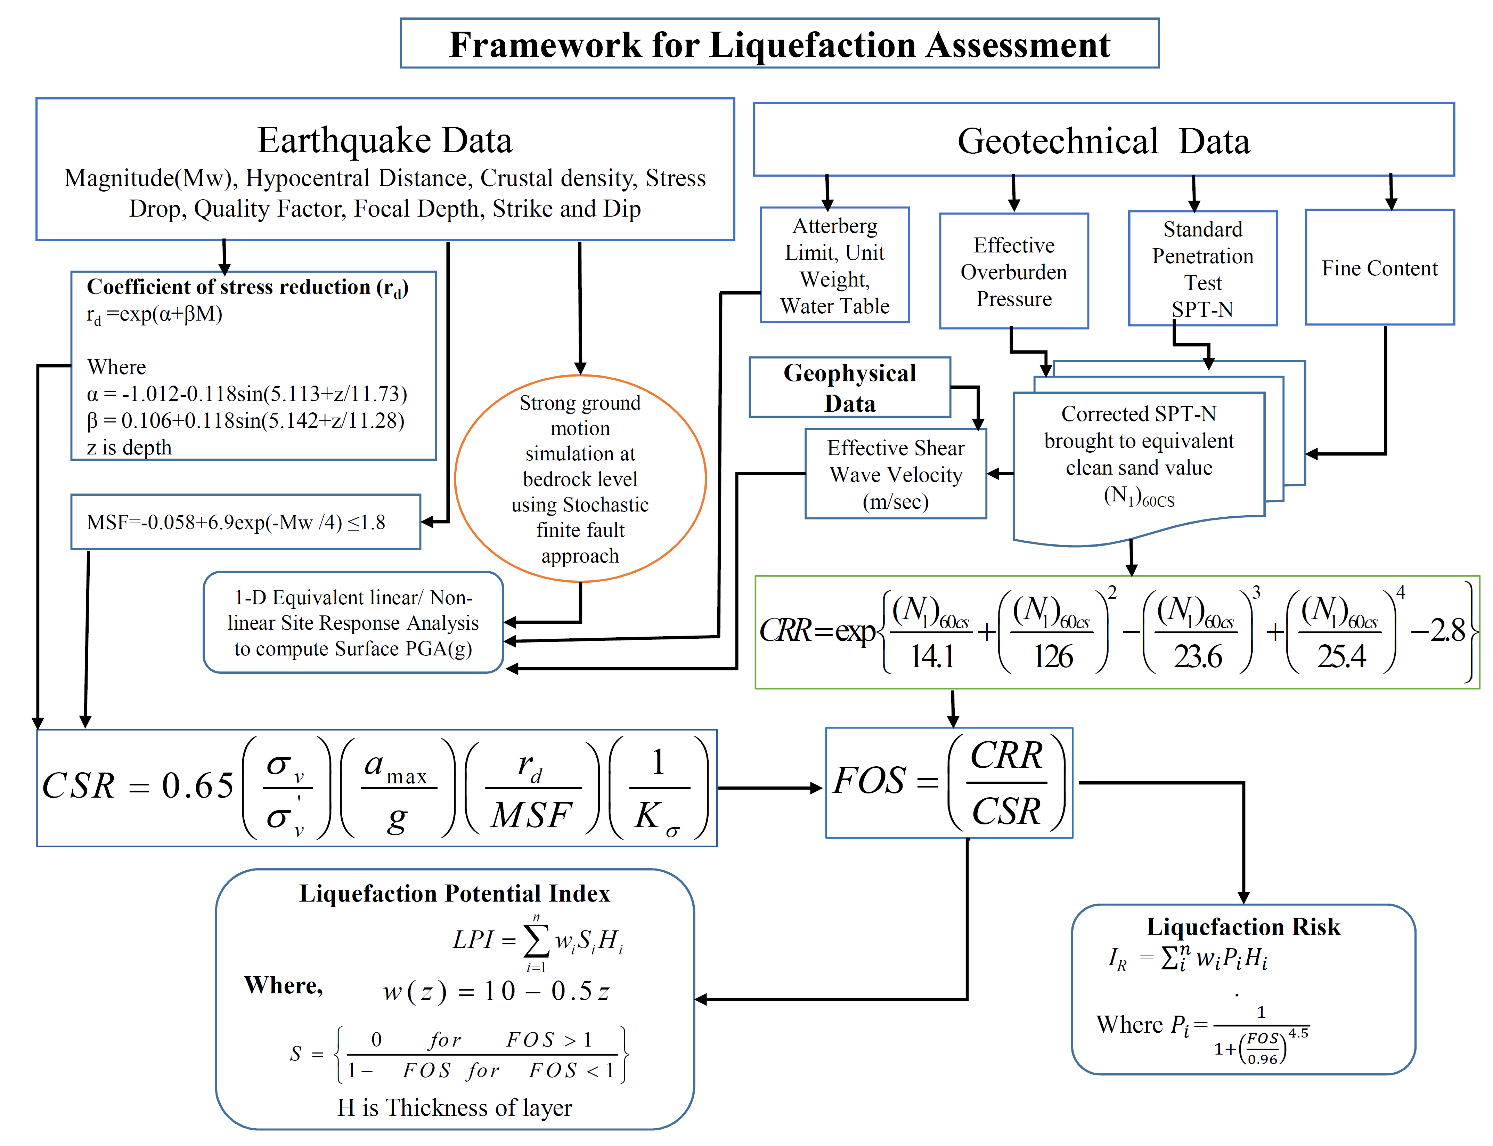


**Supplementary Figure S7.** Work Flow in Liquefaction Susceptibility Assessment in terms of Factor of Safety (FOS), Liquefaction Potential Index (LPI) and Liquefaction Risk (IR) (Modified from Nath *et al.,* 2014).

**Text S1:** **Calculation of Site Coefficient**

Site coefficient is defined as the ratio of the spectral acceleration at a site to that of a reference rock outcrop site at the same period (Sun *et al.,* 2005). The site coefficients that are used to characterize local site amplification are divided into short-period amplification factor, Fa for 0.1-0.5sec period and mid-period amplification factor, Fv for 0.4-2.0sec period following BSSC (2001) and Sun *et al.* (2005). Owing to the dependence of site effects on the local subsurface conditions (Seed *et al*., 1976), region specific estimation of site amplification factors is considered more reliable for a soft alluvial terrain like Bengal Basin in the present case. Therefore, site coefficients Fa and Fv for the region have been estimated by using the response spectra of both the soil and rock sites corresponding to large earthquakes which have impacted the region most at each of the borehole locations, by using the following formulations (Sun *et al*., 2005) as in eq. (S1) and (S2),

(S1)

(S2)

Where *RS*soil and *RSrock* are response spectra on soil and rock at a given time period *T*, while *Rsoil* and *Rrock* are the hypocentral distances of soil and rock sites respectively.

The subsurface conditions and stiffness of sediments underlying a site can be quantified in terms of its effective shear wave velocity (Vs30), lower the Vs30 value the softer will be the sediments, higher will be the site amplification and lower will be the predominant frequency. The reverse is also true. Regression curves between mean spectral amplification and effective shear wave velocity, Vs30 (bold blue line) superimposed with 95% confidence intervals for the ordinates to the true population regression line (dotted blue lines) corresponding to Short Period Amplification Factor, Fa (0.1-0.5sec) and Mid Period Amplification Factor, Fv (0.4-2.0sec) for the site class of F, E, D4, D3, D2, D1, C4, C3, C2, C1 and B in Bengal Basin are presented in **Figures S8** and **S9** respectively.


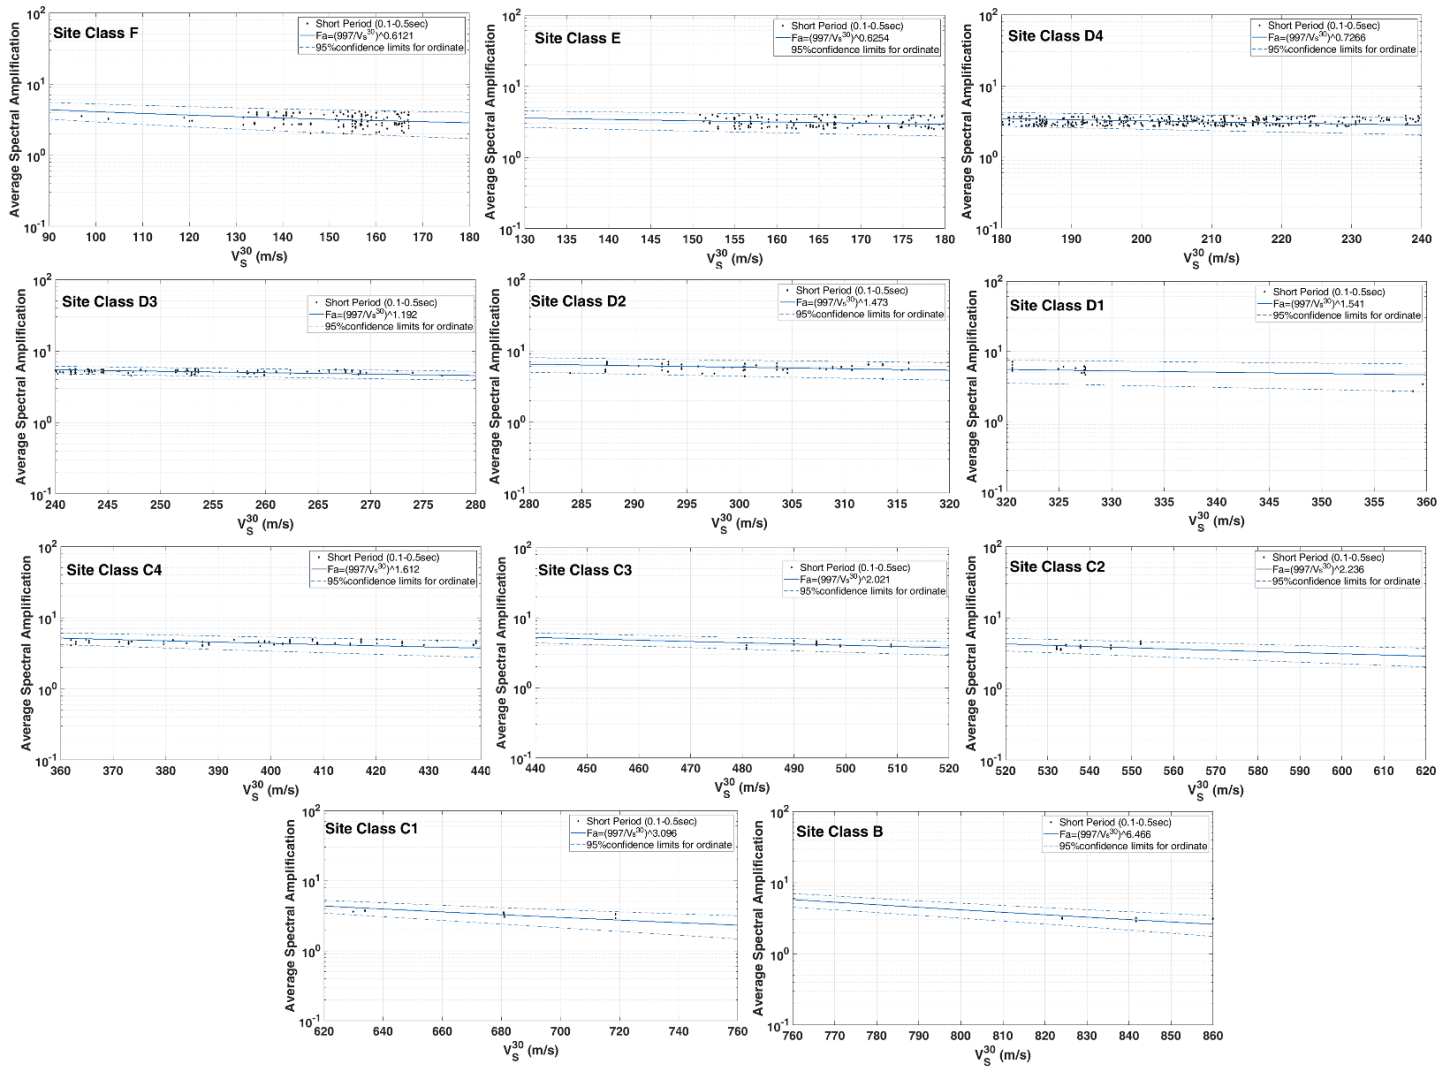


**Supplementary Figure S8.** Regression curves between mean spectral amplification and effective shear wave velocity Vs30 (bold blue line) along with 95% confidence intervals for the ordinates to the true population regression lines (dotted blue lines) corresponding to Short Period Amplification Factor, Fa (0.1-0.5sec) for site classes F, E, D4, D3, D2, D1, C4, C3, C2, C1 and B in Bengal Basin.

**
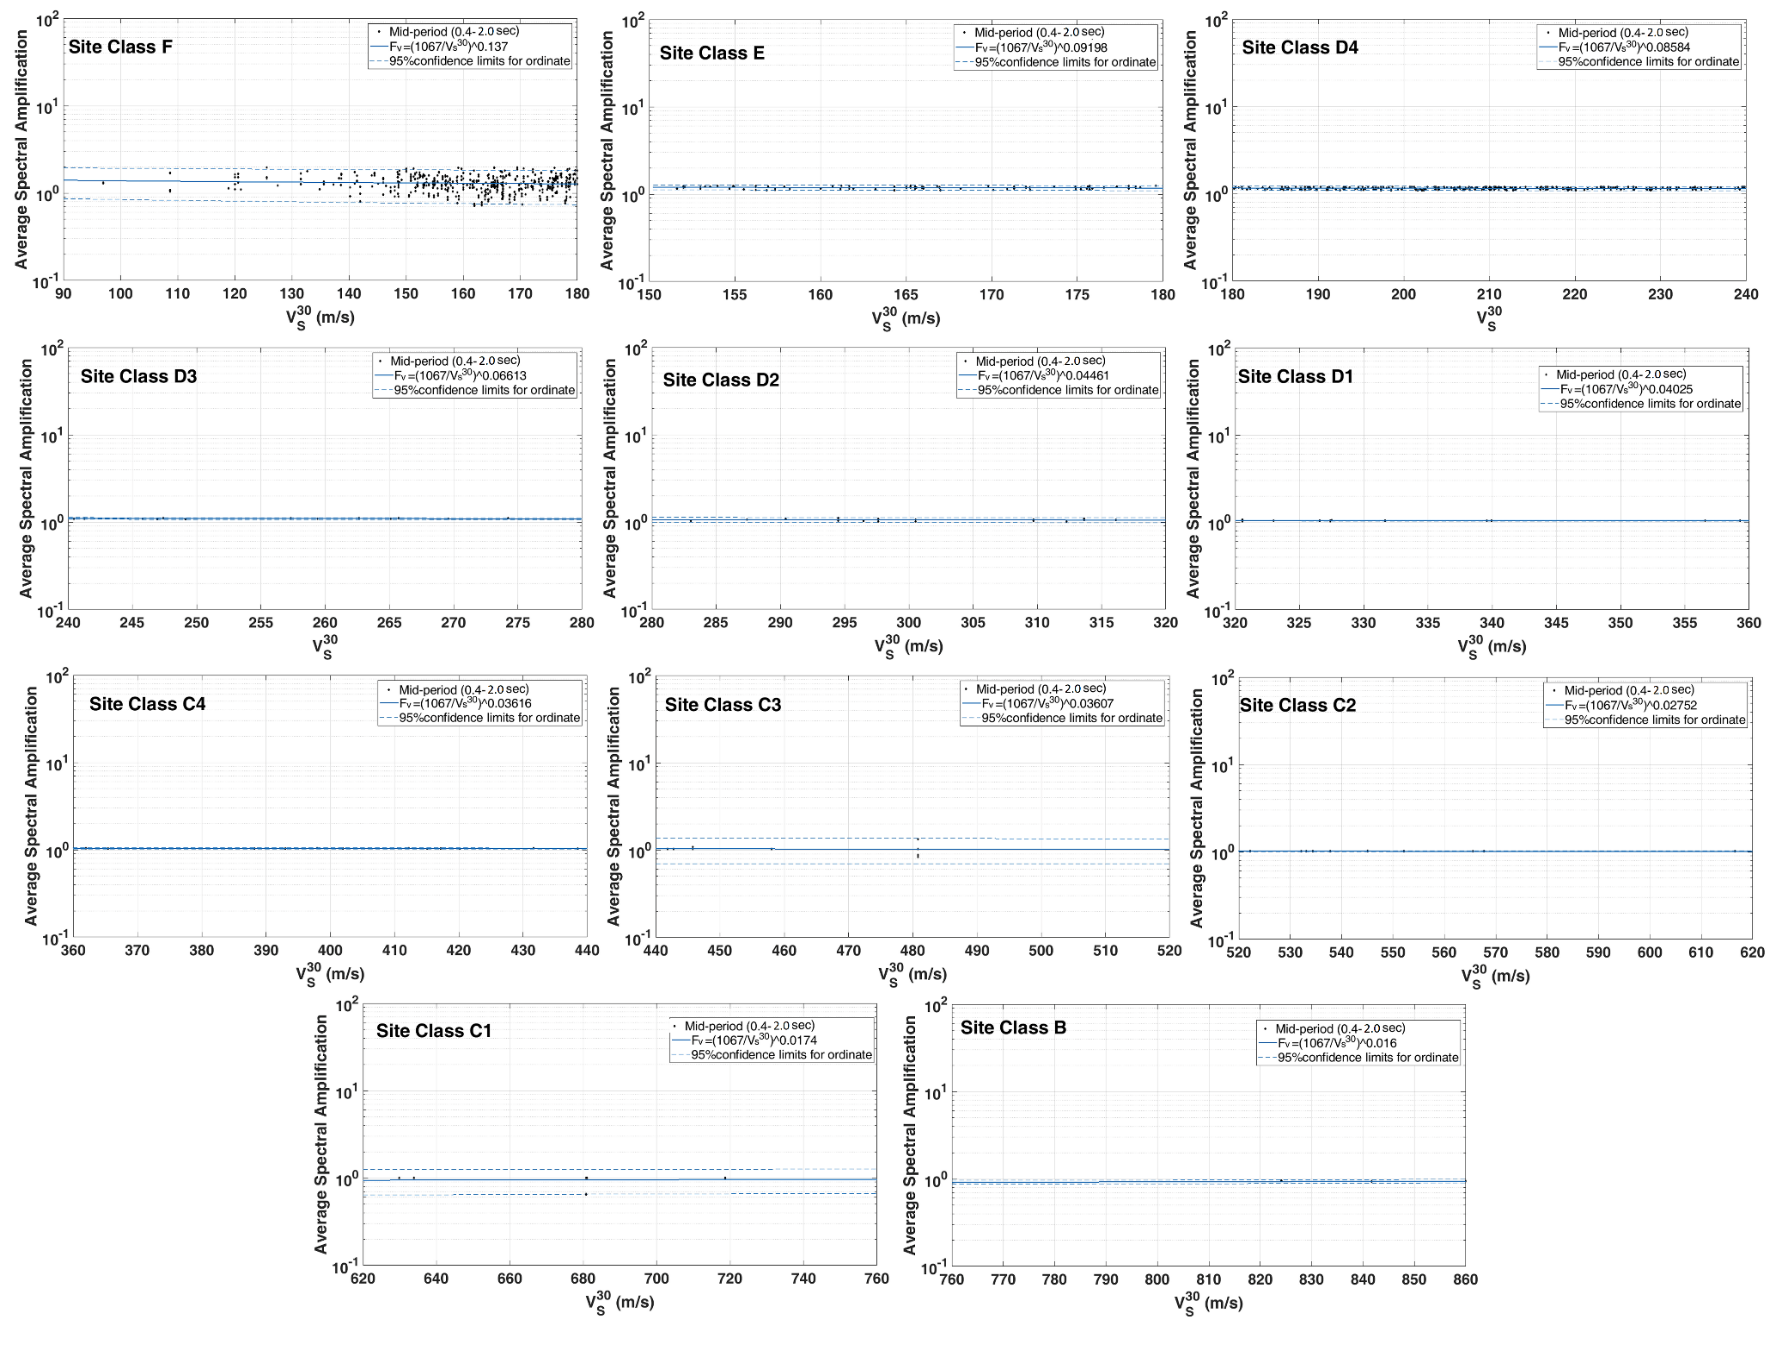
**

**Supplementary Figure S9.** Regression curves between mean spectral amplification and effective shear wave velocity Vs30 (bold blue line) along with 95% confidence intervals for the ordinates to the true population regression lines (dotted blue lines) corresponding to Mid Period Amplification Factor, Fv (0.4-2.0sec) for site classes F, E, D4, D3, D2, D1, C4, C3, C2, C1 and B in Bengal Basin.

**Text S2:** **Calculation of Design Response Spectra**

The procedure followed to work out design response spectra is adopted from IBC (2009) as given below:

1. Compute the maximum considered earthquake spectral response acceleration at 0.2 sec and 1.0 sec periods as,

*SMS* = *FaSs* (S3)

*SML* = *FvSl* (S4)

*Fa* and *Fv* correspond to the amplification factors for acceleration response spectra at 0.2 sec and 1.0 sec periods, respectively. *Ss* and *Sl* denote the spectral accelerations at the respective periods.

1. Compute the design basis earthquake spectral response acceleration at 0.2 sec and 1.0 sec periods as,

*SDS = 2/3 SMS* (S5)

*SDL = 2/3 SML*  (S6)

1. Determine the characteristic time-periods as,

*T0* = 0.2 *SDL*/*SDS* (S7)

*TS* = *SDL*/*SDS* (S8)

1. Construct the design response spectra as.

(S9)

Where *Sa* is the design spectral response acceleration and *T* is the fundamental time-period of the structure.

Design response spectra with 5% damping for both surface and bedrock level for eight cities of the study area *viz*. Dhaka, Mymensingh, Sylhet, Kolkata, Dhanbad, Bhubaneswar, Malda and Chittagong are presented in **Figure S10**, which can be used to modify the existing building codes.


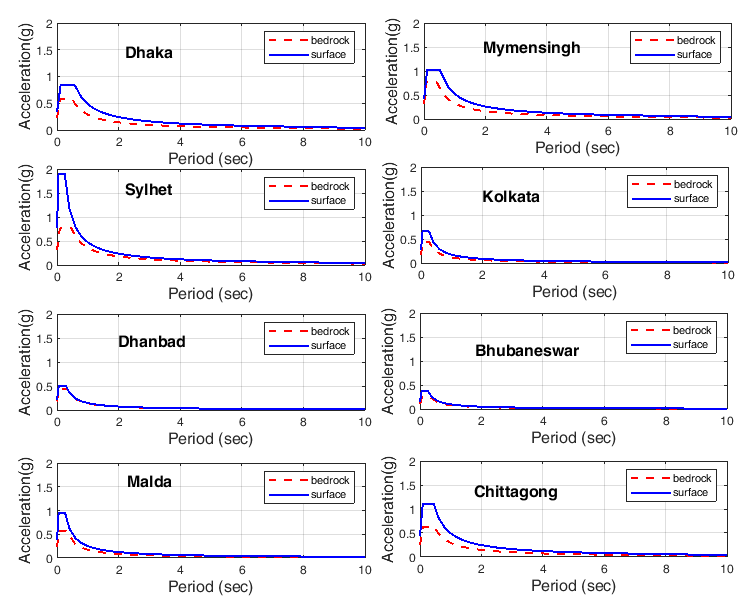


**Supplementary Figure S10.** Representative Design Response Spectra (5% damped) generated using PSA at 1.0sec and 0.2sec with 10% probability of exceedance in 50 years at Dhaka, Mymensingh, Sylhet, Kolkata, Dhanbad, Bhubaneswar, Malda and Chittagong at both the engineering bedrock and the surface-consistent level.

**Supplementary Figure S11.** Protocol used in the thematic mapping of Population Density of Bengal Basin.


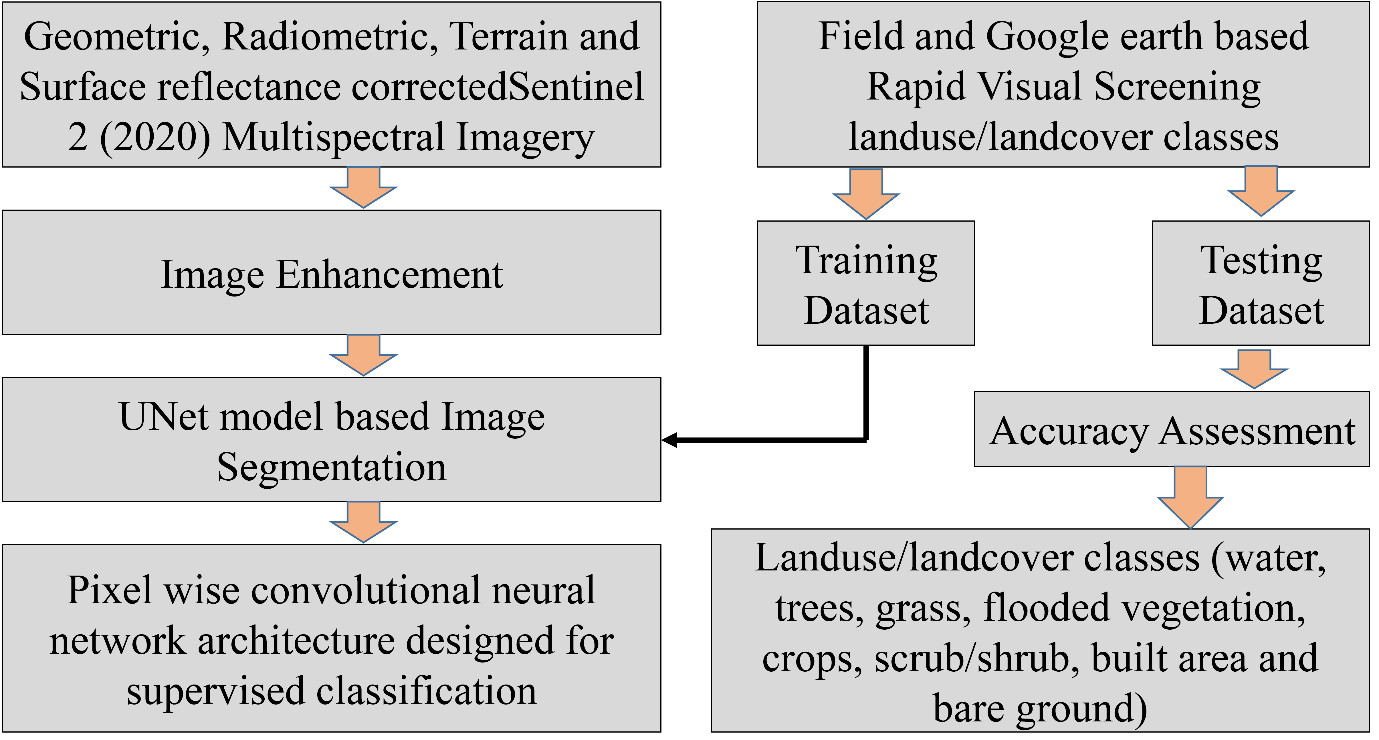


**Supplementary Figure S12.** Computationalprotocol used for Landuse/Landcover Classification in Bengal Basin.

**Supplementary Figure S13.** Computationalprotocol used for Building Density mapping in Bengal Basin.

**Supplementary Table S2.** Normalized weights and ranks assigned to respective themes and features in each of those as required for thematic integration towards predicting spatial distribution of Socio-economic Risk in Bengal Basin.

| **Themes** | **Weight** | **Attributes** | **Rank** | **Normalized Rank** |
| --- | --- | --- | --- | --- |
| Surface consistent Peak Ground Acceleration (PGA-g) with a return period of 475 years | 0.333 | 0.09<PGA≤0.20 | 1 | 0.000 |
| 0.20<PGA≤0.30 | 2 | 0.111 |
| 0.30<PGA≤0.40 | 3 | 0.222 |
| 0.40<PGA≤0.50 | 4 | 0.333 |
| 0.50<PGA≤0.60 | 5 | 0.444 |
| 0.60<PGA≤0.70 | 6 | 0.555 |
| 0.70<PGA≤0.80 | 7 | 0.666 |
| 0.80<PGA≤0.90 | 8 | 0.777 |
| 0.90<PGA≤1.00 | 9 | 0.888 |
| 1.00<PGA≤1.17 | 10 | 1.000 |
| Population Density (per km2)  (PD) | 0.267 | 56<PD≤116 | 1 | 0.000 |
| 116<PD≤189 | 2 | 0.111 |
| 189<PD≤314 | 3 | 0.222 |
| 314<PD≤540 | 4 | 0.333 |
| 540<PD≤883 | 5 | 0.444 |
| 883<PD≤1396 | 6 | 0.555 |
| 1396<PD≤3129 | 7 | 0.666 |
| 3129<PD≤7721 | 8 | 0.777 |
| 7721<PD≤11133 | 9 | 0.888 |
| 11133<PD≤43586 | 10 | 1.000 |
| Number of Household  (NOH) | 0.200 | 60141<NOH≤163949 | 1 | 0.000 |
| 163949<NOH≤232962 | 2 | 0.111 |
| 232962<NOH≤296109 | 3 | 0.222 |
| 296109<NOH≤349558 | 4 | 0.333 |
| 349558<NOH≤433768 | 5 | 0.444 |
| 433768<NOH≤540222 | 6 | 0.555 |
| 540222<NOH≤688367 | 7 | 0.666 |
| 688367<NOH≤965155 | 8 | 0.777 |
| 965155<NOH≤1301610 | 9 | 0.888 |
| 1301610<NOH≤2348683 | 10 | 1.000 |
| Landuse/Landcover (LULC) | 0.133 | Water | 1 | 0.000 |
| Trees | 3 | 0.286 |
| Grass | 2 | 0.143 |
| Flooded Vegetation | 5 | 0.571 |
| Bare ground | 4 | 0.429 |
| Scrub/Shrub | 6 | 0.714 |
| Built Area | 8 | 1.000 |
| Crops | 7 | 0.857 |
| Building Density (per km2)  (BD) | 0.067 | 0<BD≤0.75 | 1 | 0.000 |
| 0.75<BD≤1.13 | 2 | 0.111 |
| 1.13<BD≤1.31 | 3 | 0.222 |
| 1.31<BD≤1.69 | 4 | 0.333 |
| 1.69<BD≤2.44 | 5 | 0.444 |
| 2.44<BD≤3.96 | 6 | 0.555 |
| 3.96<BD≤7.01 | 7 | 0.666 |
| 7.01<BD≤13.16 | 8 | 0.777 |
| 13.16<BD≤25.53 | 9 | 0.888 |
| 25.53<BD≤50.43 | 10 | 1.000 |

**Supplementary Table S3.** Normalized weights and ranks assigned to respective themes and features in each of those as required for thematic integration towards generating Holistic Seismic Hazard Microzonation Map of the city of Dhanbad in Jharkhand.

| **Thematic layers** | **Attributes** | **Rank** | **Normalized rank** | **Weight** |
| --- | --- | --- | --- | --- |
| Surface consistent Peak Ground Acceleration (PGA-g) with a return period of 475 years | 0.168<PGA≤0.179 | 1 | 0.00 | 0.286 |
| 0.179<PGA≤0.189 | 2 | 0.11 |
| 0.189<PGA≤0.199 | 3 | 0.22 |
| 0.199<PGA≤0.209 | 4 | 0.33 |
| 0.209<PGA≤0.219 | 5 | 0.44 |
| 0.219<PGA≤0.230 | 6 | 0.56 |
| 0.230<PGA≤0.240 | 7 | 0.67 |
| 0.240<PGA≤0.250 | 8 | 0.78 |
| 0.250<PGA≤0.260 | 9 | 0.89 |
| 0.260<PGA≤0.270 | 10 | 1.00 |
|  | | | | |
| Probabilistic Liquefaction Potential Index (LPI) | LPI=0 (Low) | 1 | 0.00 | 0.238 |
| 0<LPI≤5 (Moderate) | 2 | 0.50 |
| 5<LPI≤15 (High) | 3 | 1.00 |
|  | | | | |
| Site Class | D3 | 3 | 1.00 | 0.190 |
| D2 | 2 | 0.50 |
| D1 | 1 | 0.00 |
|  | | | | |
| Predominant Frequency (Hz) | 3.747<PF≤3.857 | 10 | 1.00 | 0.143 |
| 3.857<PF≤4.186 | 9 | 0.89 |
| 4.186<PF≤4.516 | 8 | 0.78 |
| 4.516<PF≤4.735 | 7 | 0.67 |
| 4.735<PF≤5.064 | 6 | 0.56 |
| 5.064<PF≤5.284 | 5 | 0.44 |
| 5.284<PF≤5.613 | 4 | 0.33 |
| 5.613<PF≤5.832 | 3 | 0.22 |
| 5.832<PF≤6.162 | 2 | 0.11 |
| 6.162<PF≤6.491 | 1 | 0.00 |
|  | | | | |
| Geomorphology | Waterbodies | 4 | 1.00 | 0.095 |
| Quarry and Mine Dump | 3 | 0.67 |
| Pediment Pediplain Complex | 2 | 0.33 |
| Moderately Dissected Hills and Valleys | 1 | 0.00 |
|  | | | | |
| Surface Geology | Sandstone, siltstone, shale with coal | 9 | 1.00 | 0.048 |
| Ferruginous sandstone | 8 | 0.88 |
| Shale, sandstone, conglomerate | 7 | 0.75 |
| Mica schist / schist | 6 | 0.63 |
| Hornblende schist, amphibolite, meta ultrabasite | 5 | 0.50 |
| Quartz vein/reef | 4 | 0.38 |
| Dolerite | 3 | 0.25 |
| Granite gneiss | 2 | 0.13 |
| Quartzite, quartz schist | 1 | 0.00 |

**Supplementary Table S4.** Normalized weights and ranks assigned to respective themes and features in each of those as required for thematic integration of those towards generating Holistic Seismic Hazard Microzonation Map of the city of Mymensingh in Bangladesh.

| **Thematic layers** | **Attributes** | **Rank** | **Normalized rank** |
| --- | --- | --- | --- |
| Surface consistent Peak Ground Acceleration (PGA-g) with a return period of 475 years | 0.611<PGA≤0.664 | 1 | 0.00 |
| 0.664<PGA≤0.718 | 2 | 0.11 |
| 0.781<PGA≤0.772 | 3 | 0.22 |
| 0.772<PGA≤0.825 | 4 | 0.33 |
| 0.825<PGA≤0.879 | 5 | 0.44 |
| 0.879<PGA≤0.932 | 6 | 0.56 |
| 0.932<PGA≤0.986 | 7 | 0.67 |
| 0.986<PGA≤1.040 | 8 | 0.78 |
| 1.040<PGA≤1.093 | 9 | 0.89 |
| 1.093<PGA≤1.147 | 10 | 1.00 |
|  |  |  |  |
| Probabilistic Liquefaction Potential Index (LPI) | LPI=0 (Low) | 1 | 0.00 |
| 0<LPI≤5 (Moderate) | 2 | 0.33 |
| 5<LPI≤15 (High) | 3 | 0.67 |
| LPI>15 (Severe) | 4 | 1.00 |
|  |  |  |  |
| Site Class | F | 4 | 1.00 |
| E | 3 | 0.67 |
| D4 | 2 | 0.33 |
| D3 | 1 | 0.00 |
|  |  |  |  |
| Predominant Frequency (Hz) | 1.732<PF≤2.184 | 10 | 1.00 |
| 2.184<PF≤2.636 | 9 | 0.89 |
| 2.636<PF≤3.088 | 8 | 0.78 |
| 3.088<PF≤3.540 | 7 | 0.67 |
| 3.540<PF≤3.992 | 6 | 0.56 |
| 3.992<PF≤4.444 | 5 | 0.44 |
| 4.444<PF≤4.896 | 4 | 0.33 |
| 4.896<PF≤5.348 | 3 | 0.22 |
| 5.348<PF≤5.799 | 2 | 0.11 |
| 5.799<PF≤6.251 | 1 | 0.00 |
|  |  |  |  |
| Geomorphology | Active Channels | 7 | 1.00 |
| Lateral Bar | 6 | 0.83 |
| Point Bar | 5 | 0.67 |
| Natural Levee | 4 | 0.50 |
| Depression | 3 | 0.33 |
| Flood Basin | 2 | 0.17 |
| Flood Plain | 1 | 0.00 |
|  |  |  |  |
| Surface Geology | Active Channel Deposit | 5 | 1.00 |
| Bar Deposit | 4 | 0.75 |
| Natural Levee Deposit | 3 | 0.50 |
| Depression Deposit | 2 | 0.25 |
| Old Flood Plain Deposit (Mymensingh Terrace) | 1 | 0.00 |

**Text S3: Formulation for calculating Correlation co-efficient and Covariance**

Correlation co-efficient (Lee and Nicewander, 1988) and Covariance (Park and Park, 2018) can be calculated as eq. (S10) and eq. (S11)

(S10)

(S11)

Where, = data value of the Scenario Seismic Hazard Index (SSHI), = data value of the Predicted Seismic Hazard Index (PSHI), = mean of SSHI, = mean of PSHI, *n =* number of data points, *r* = Correlation co-efficient between SSHI and PSHI, and = Covariance between variables SSHI and PSHI.

**Capacity Spectrum Method as employed in MATLAB-based SELENA (after Molina *et al.,* 2014) for Damage, Casualty and Economic Loss Modelling in Bengal Basin:**


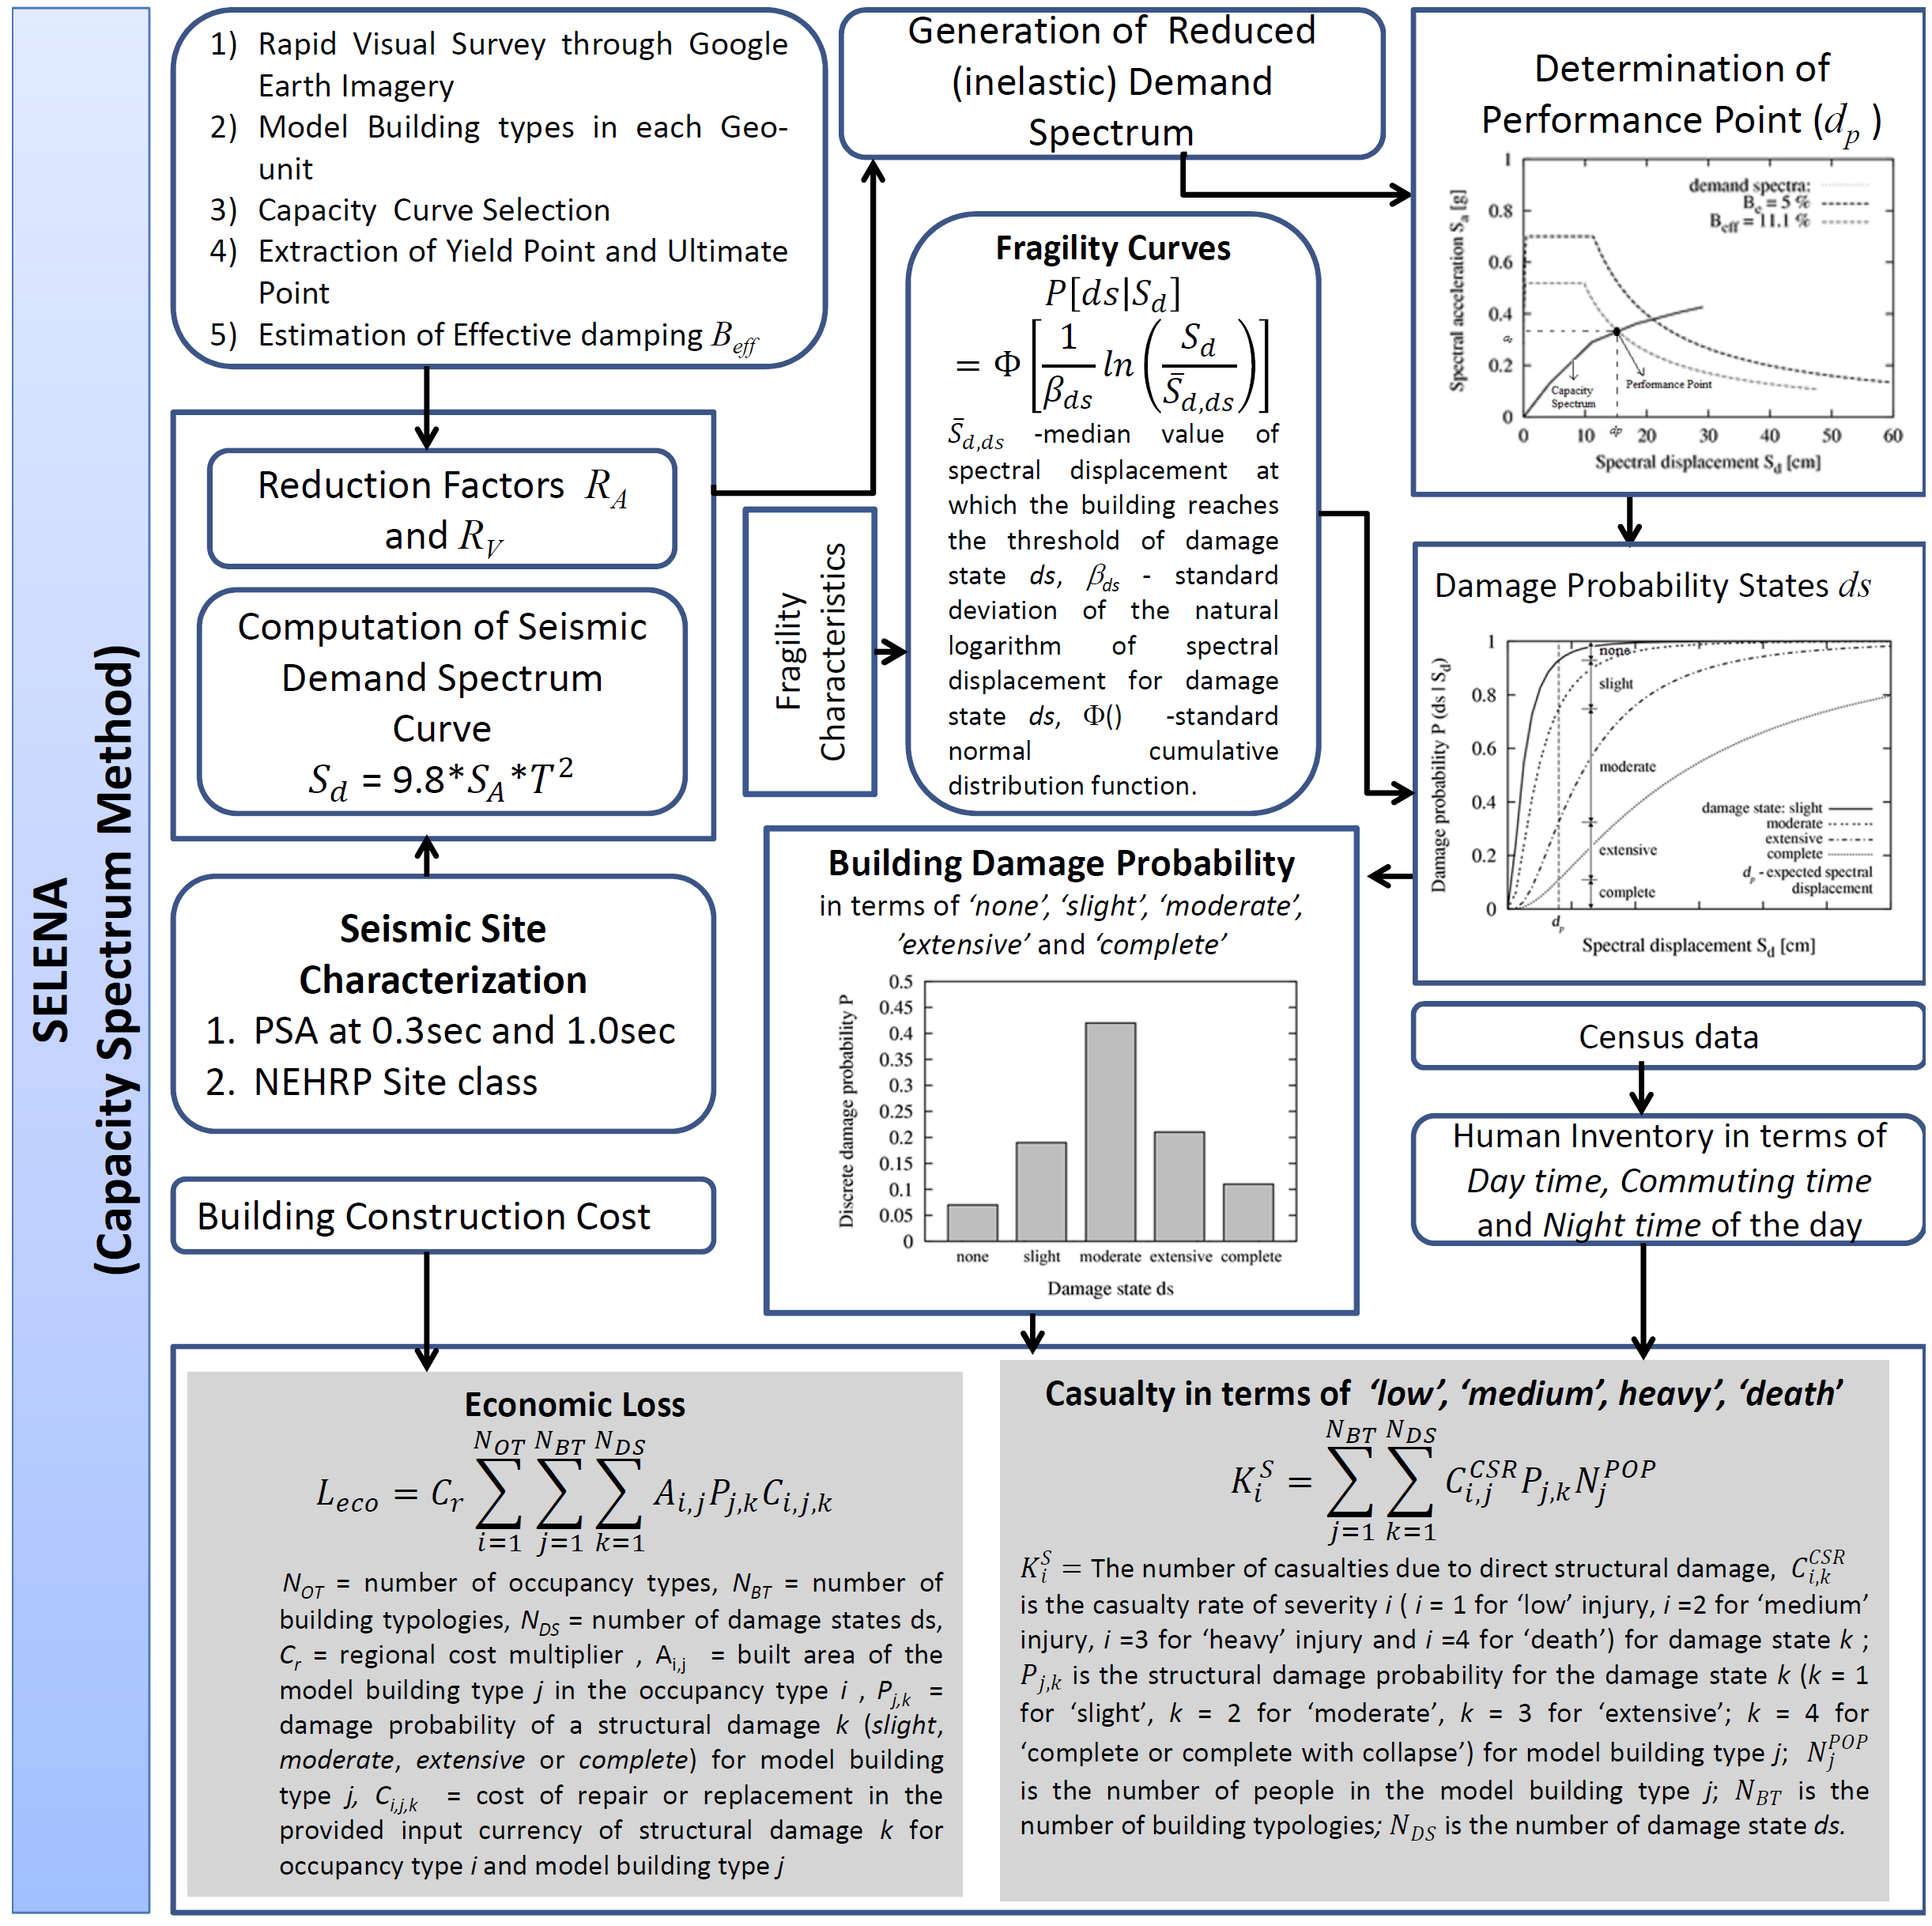


**Supplementary Figure S14.** Computational Framework of the MATLAB-based SELENA software package for damage, casualty and economic loss modelling as per Molina *et al.* (2014).

**References:**

Atkinson, G. M., and Boore, D. M. (2006). Earthquake ground-motion predictions for eastern North America. *Bulletin of the Seismological Society of America* 96, 2181–2205. [doi:10.1785/0120050245](https://doi.org/10.1785/0120050245)

Atkinson, G. M., and Assatourians, K. (2015). Implementation and Validation of EXSIM (A Stochastic Finite-Fault Ground-Motion Simulation Algorithm) on the SCEC Broadband Platform. *Seismological Research Letter* 86 (1), 48-60. [doi:10.1785/0220140097](https://doi.org/10.1785/0220140097)

Beresnev, I. A., and Atkinson, G. M. (1997). Modeling finite-fault radiation from the ωn spectrum. *Bulletin of the Seismological Society of America* 87 (1), 67–84. doi:10.1785/BSSA0870010067

BSSC. (2001). NEHRP recommended provisions for seismic regulations for new buildings and other structures. 2000 Edition, Part 1: Provisions, Building Seismic Safety Council for the Federal Emergency Management Agency (Report FEMA 368), Washington D.C.

Boore, D. M. (1983). Stochastic simulation of high-frequency ground motions based on seismological

models of the radiated spectra. *Bulletin of the Seismological Society of America* 73 (6A), 1865–1894. doi:10.1785/BSSA07306A1865

Boore, D. (2003). Simulation of Ground Motion Using the Stochastic Method. *Pure and applied geophysics* 160 (3), 635–676. doi:10.1007/PL00012553

BWDB. (2020). Bangladesh Water Development Board, *Ministry of Water Resources, Government of People’s Republic of Bangladesh.* Available: <http://www.hydrology.bwdb.gov.bd/>

Campbell, K. W., and Bozorgnia, Y. (2003). Updated near-source ground-motion (attenuation) relations for the horizontal and vertical components of peak ground acceleration and acceleration response spectra. *Bulletin of the Seismological Society of America* 93, 314-331. [doi:10.1785/0120020029](https://doi.org/10.1785/0120020029)

Campbell, K. W., and Bozorgnia, Y. (2008). NGA ground motion model for the geometric mean horizontal component of PGA, PGV, PGD and 5% damped linear elastic response spectra for periods ranging from 0.01 to 10s. *Earthquake Spectra* 24, 139–171. [doi:10.1193/1.2857546](https://doi.org/10.1193%2F1.2857546)

CGWB. (2018). Central Ground Water Board, *Ministry of Water Resources, RD & GR, Govt. of India.* Available: <http://cgwb.gov.in/GW-data-access.html>

Hashash, Y. M. A., Musgrove, M. I., Harmon, J. A., Ilhan, O., Xing, G., Numanoglu, O., et al. (2020). "DEEPSOIL 7, User Manual". Urbana, IL, Board of Trustees of University of Illinois at Urbana-Champaign. Available: <http://deepsoil.cee.illinois.edu/>

IBC. (2009). International Building Code, International Code Council, Inc. Country Club Hills, Illinois.

Lee Rodgers, J., and Nicewander, W. A. (1988). Thirteen ways to look at the correlation coefficient. *The American Statistician* 42 (1), 59-66.

Maiti, S. K., Nath, S. K., Adhikari, M. D., Srivastava, N., Sengupta, P., and Gupta, A. K. (2017). Probabilistic seismic hazard model of West Bengal, India. *Journal of Earthquake Engineering* 21(7), 1113-1157. [doi:10.1080/13632469.2016.1210054](https://doi.org/10.1080/13632469.2016.1210054)

Molina, S., Lang, D. H., and Lindholm, C. D. (2014). SELENA v6.0: User and Technical Manual v6.0, Report no. 14-003, Kjeller (Norway) – Alicante (Spain), 102.

Nath, S. K. (2017). Probabilistic Seismic Hazard Atlas of 40 Cities in India published by Geoscience Division, Ministry of Earth Sciences (MoES), Govt. of India, New Delhi, © MoES, Govt. of India, 457p.

Nath, S. K., Adhikari, M. D., Maiti, S. K., Devaraj, N., Srivastava, N., and Mohapatra, L. D. (2014). Earthquake scenario in West Bengal with emphasis on seismic hazard microzonation of the city of Kolkata, India, *Natural Hazards and Earth System Science* 14, 2549–2575. [doi:10.5194/nhess-14-2549-2014](https://doi.org/10.5194/nhess-14-2549-2014)

Nath, S. K., Thingbaijam, K. K. S., Maiti, S. K., and Nayak, A. (2012). Ground-motion predictions in Shillong region, northeast India. *Journal of Seismology*. 16 (3), 475-488. [doi:10.1007/s10950-012-9285-8](https://doi.org/10.1007/s10950-012-9285-8)

Nath, S. K., Raj, A., Thingbaijam, K. K. S., and Kumar, A. (2009). Ground motion synthesis and seismic scenario in Guwahati city—a stochastic approach. *Seismological Research Letters* 80 (2), 233-242. [doi:10.1785/gssrl.80.2.233](https://doi.org/10.1785/gssrl.80.2.233)

Park, K. I., and Park, M. (2018). Fundamentals of probability and stochastic processes with applications to communications (pp. 51-72). Cham, Switzerland: Springer International Publishing.

Raghukanth, S. T. G., and Iyengar, R. N. (2007). Estimation of seismic spectral acceleration in Peninsular India, *Journal of Earth System Science* 116 (3), 199–214. [doi:10.1007/s12040-007-0020-8](https://doi.org/10.1007/s12040-007-0020-8)Seed, H. B., Ugas, C., and Lysmer, J. (1976). Site-dependent spectra for earthquake-resistant design. *Bulletin of the Seismological Society of America* 66 (1), 221-243. [doi:10.1785/BSSA0660010221](https://doi.org/10.1785/BSSA0660010221)

Sharma, M. L., Douglas, J., Bungum, H., and Kotadia, J. (2009). Ground-Motion Prediction Equations Based on Data from the Himalayan and Zagros Regions, *Journal Earthquake Engineering* 13(8), 1191-1210. [doi:10.1080/13632460902859151](https://doi.org/10.1080/13632460902859151)

Sun, C. G., Kim, D. S., and Chung, C. K. (2005). Geologic site conditions and site coefficients for estimating earthquake ground motions in the inland areas of Korea. *Engineering Geology* 81 (4), 446-469. [doi:10.1016/j.enggeo.2005.08.002](https://doi.org/10.1016/j.enggeo.2005.08.002)

Toro, G. R. (2002). Modification of the Toro et al. (1997) attenuation equations for large magnitudes and short distances, *Risk Engineering Technical Report, 10.*

Youngs, R. R., Chiou, S. J., Silva, W. J., and Humphrey, J. R. (1997). Strong ground motion relationships for subduction zone earthquakes, *Seismological Research Letter* 68 (1), 58–73. [doi:10.1785/gssrl.68.1.58](https://doi.org/10.1785/gssrl.68.1.58)
